# Supplementary material
Source: Springer Nature journal article supplement (https://mijn.bsl.nl/resource/supplementary/13047_2013_603_MOESM9_ESM.pdf/7112994)

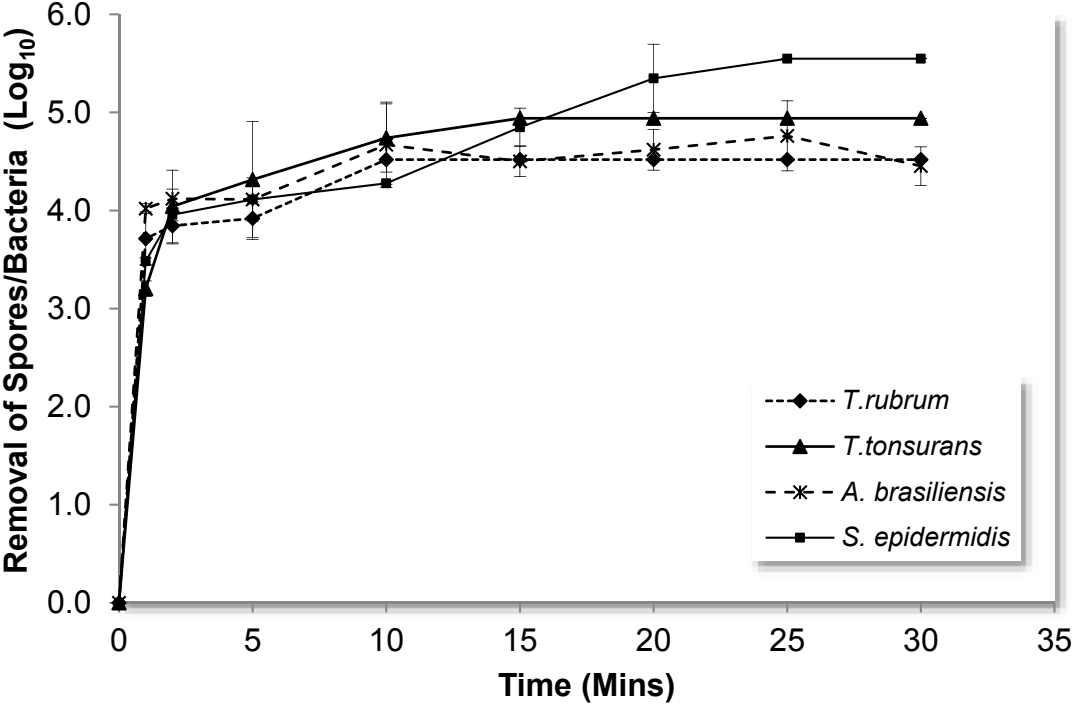

Supplement: MOESM9 [file 7112994]
